# Supplementary material for: Genetic Deletion of Socs3 in Smooth Muscle Cells Ameliorates Aortic Dissection in Mice
Source: PubMed Central journal article supplement — JACC Basic Transl Sci. 2020 Jan 8;5(2):126–44. doi: 10.1016/j.jacbts.2019.10.010 (PMC7046542; doi:10.1016/j.jacbts.2019.10.010), 2020-01-08
Supplement: mmc1.pdf [file mmc1.pdf]

SUPPLEMENTAL MATERIAL

**SUPPLEMENTAL FIGURE S1 Hemodynamic parameters and body weight**

Systolic blood pressure, heart rate, and body weight for each experimental group during the BAPN+AngII challenge.

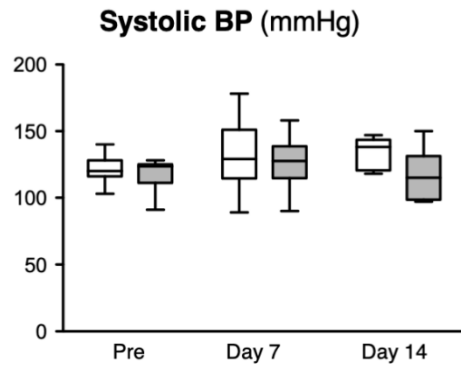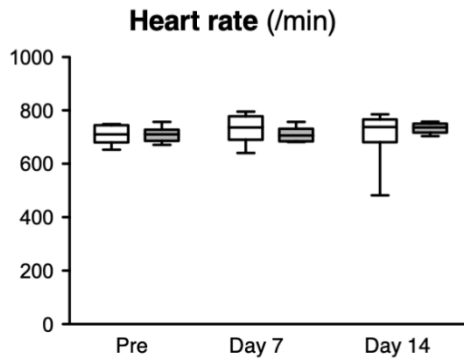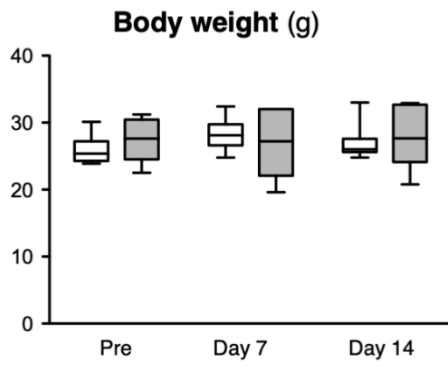

## **SUPPLEMENTAL FIGURE S2 Blood vessel tensile tester**

(A) Diagram of the blood vessel tensile tester used to measure mechanical properties of the aortic wall. (B) A representative time-force recording shows sharp and blunt peaks, which occurred at the times of maximal tensile forces in the media and adventitia, respectively. (C) A representative series of video images (*left*) and corresponding time-force recordings (*right*), showing the changes observed during force applied by pulling the rods apart. Vertical lines on the recordings indicate the time during the measurement that the image was taken.

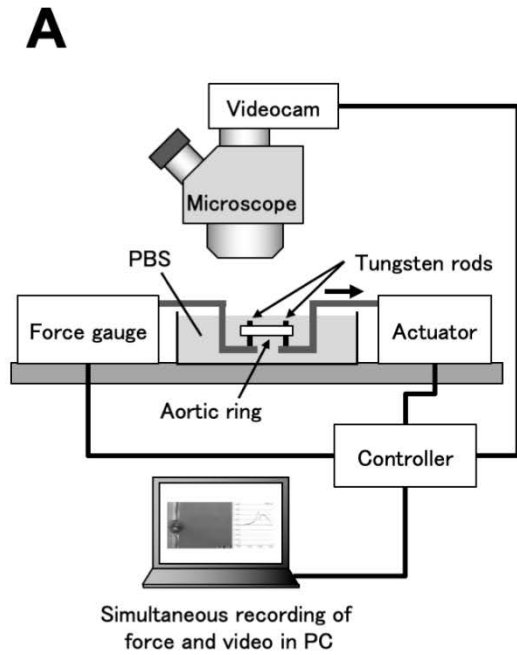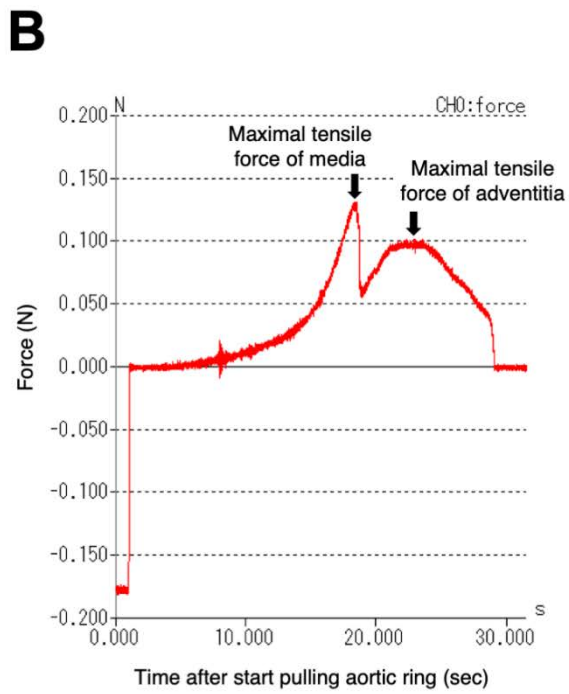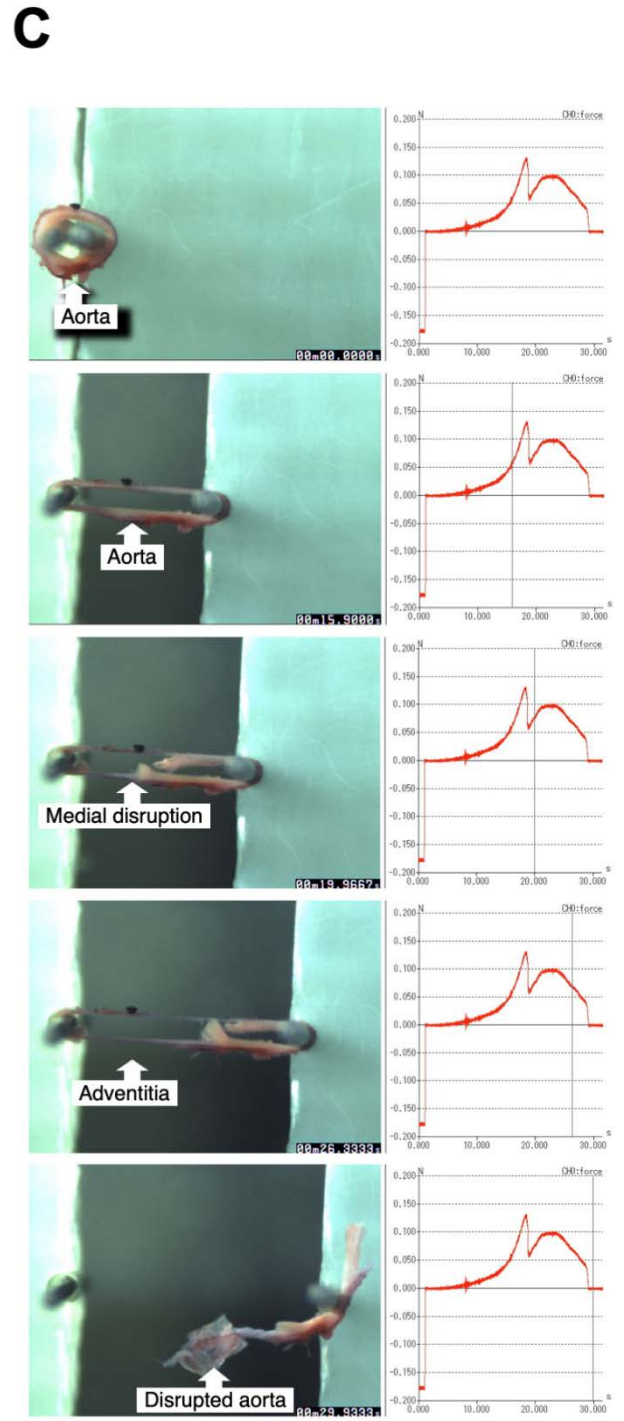

### **SUPPLEMENTAL FIGURE S3 Mouse AD model**

Representative images show signs of AD in serial sections of the distal arch isolated from a BAPN+AngII-treated mouse. (*Left*) Hematoxylin and eosin staining. (*Right*) EVG staining. Upper panels appear U-shaped because they show a part of the aortic arch. Lower panels show the proximal descending aorta. Black arrows indicate the site of tearing. White arrowheads indicate the intramural hematoma adjacent to the tear. Black arrowheads indicate cellular infiltration in the adventitia surrounding the site of entry. Scale bar: 200  $\mu\text{m}$ .

H&E

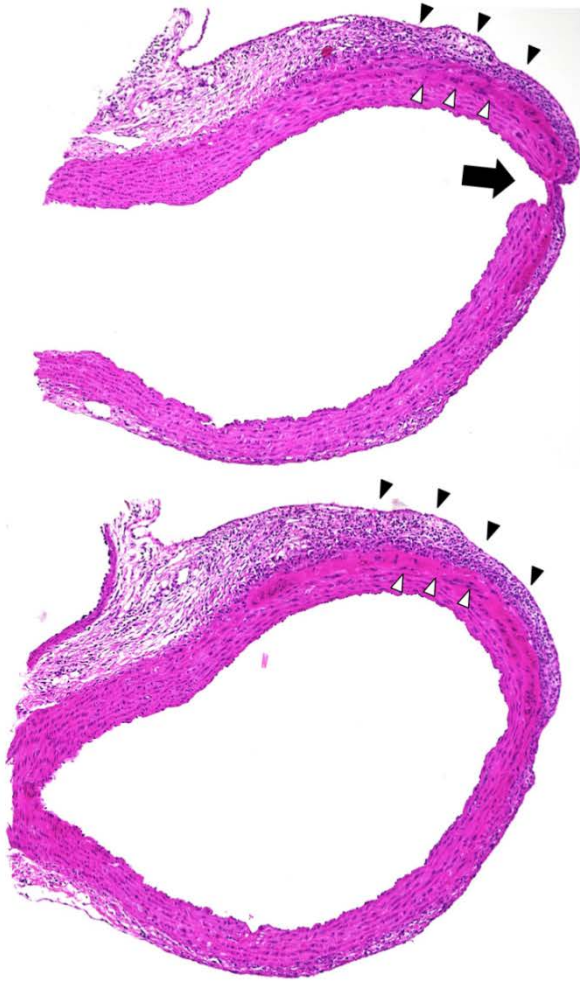

EVG

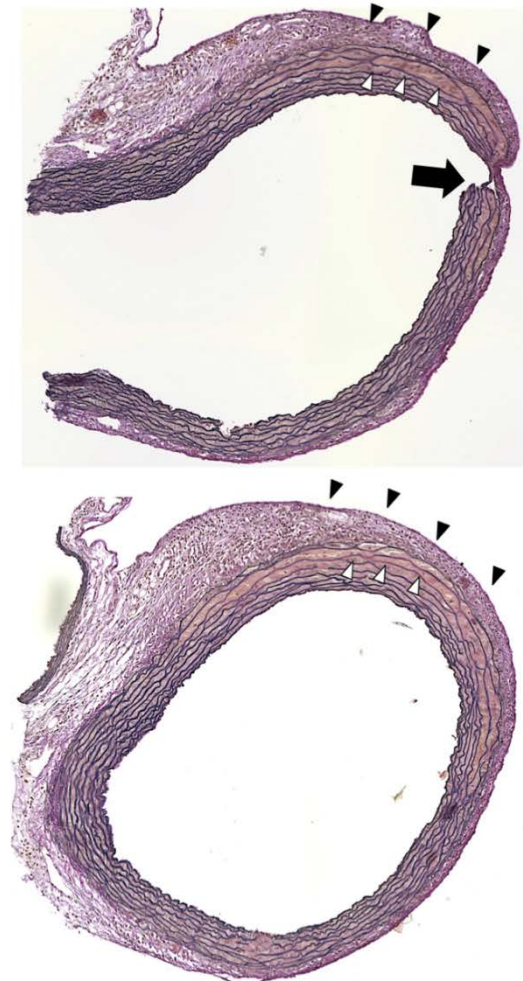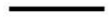

**SUPPLEMENTAL FIGURE S4 Gene expression pattern induced by smooth muscle *Socs3* deletion or BAPN+AngII challenge**

The gene expression changes induced by smooth muscle *Socs3* deletion (smSocs3-KO) show a correlation with the changes induced by BAPN+AngII (B+A) challenge compared with baseline. Values indicate logarithm of fold changes to base 2. Red line indicates the linear regression for the smSocs3-KO and B+A datasets.

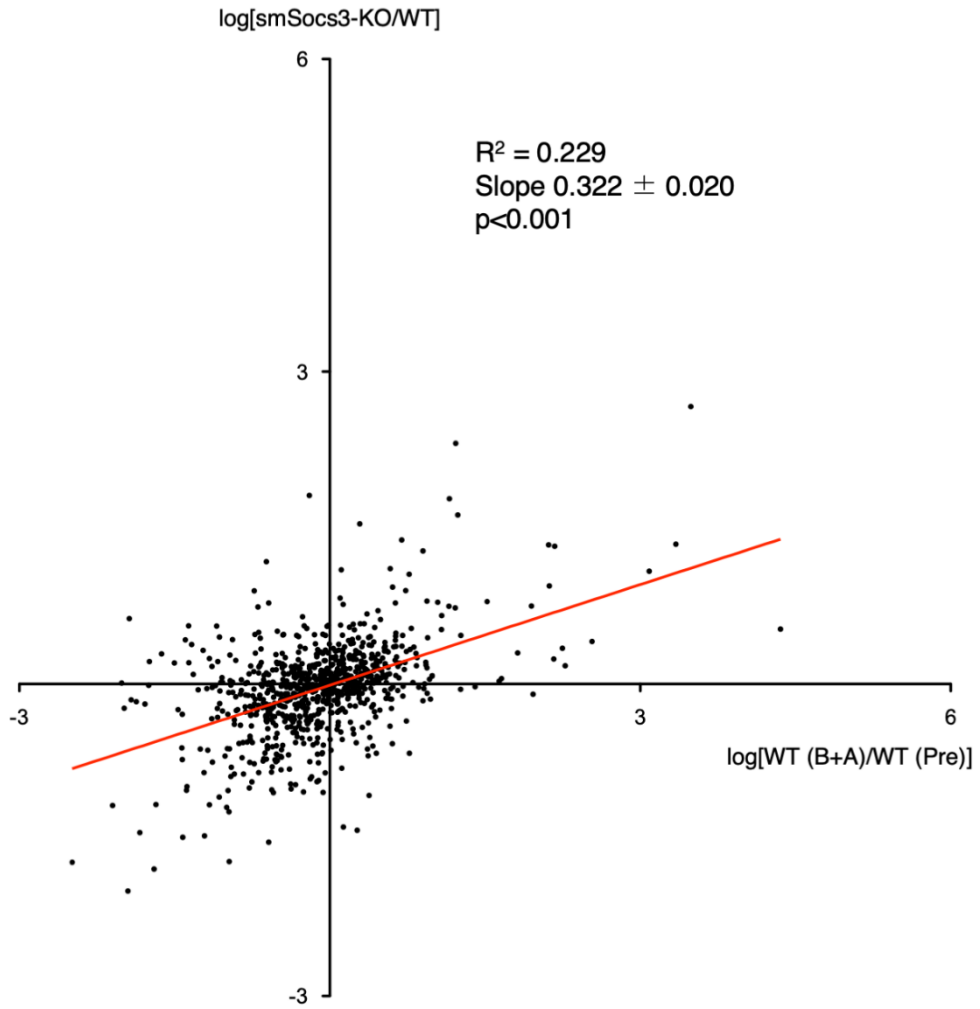

Hirakata, Supplemental Figure S4



### **SUPPLEMENTAL FIGURE S5 Picrosirius red staining of heart tissue**

Representative images are shown for picrosirius red staining of heart tissue sections from wild-type and smSocs3-KO mice. Bar: 1 mm. Rectangular areas in the upper panels correspond to enlarged images in the lower panels.

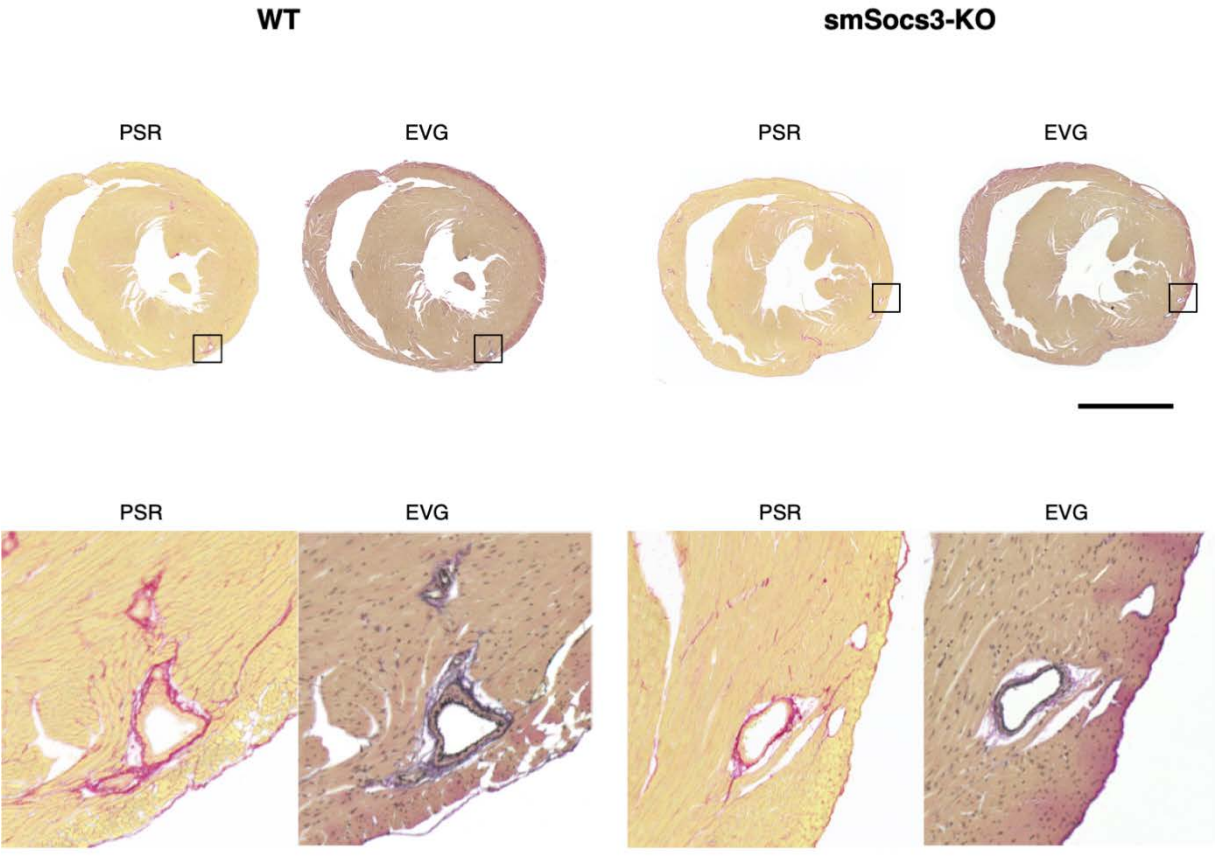

Hirakata, Supplemental Figure S5

**SUPPLEMENTAL TABLE S1 Induced genes in smSocs3-KO aorta compared with WT aorta  
at the baseline**







|          |        |             |             |             |             |             |             |             |       |
|----------|--------|-------------|-------------|-------------|-------------|-------------|-------------|-------------|-------|
| Cysltr1  | 58861  | 81.81044917 | 97.81993917 | 71.83044667 | 121.6015192 | 182.8527333 | 219.1964917 | 2.039121519 | 0.007 |
| Grrp1    | 72690  | 89.88207159 | 96.55576748 | 107.4004732 | 148.8577861 | 229.2819804 | 230.4525026 | 2.035893895 | 0.003 |
| Tmem176b | 65983  | 5172.137083 | 5180.343583 | 5114.810917 | 8339.713508 | 10035.19217 | 13687.54775 | 2.029464376 | 0.003 |
| Slc9a3r1 | 26941  | 309.339975  | 413.855682  | 216.290525  | 544.0617833 | 574.7258583 | 737.2166    | 2.026720717 | 0.010 |
| Gair2    | 14428  | 7.011698417 | 6.310986328 | 8.705124167 | 19.690335   | 17.00248357 | 9.558440833 | 2.0252829   | 0.016 |
| Pibd1    | 66857  | 832.0021833 | 751.428125  | 538.0607583 | 1256.06185  | 1355.173242 | 1640.132869 | 2.024637211 | 0.003 |
| Psd4     | 215632 | 12.45036058 | 10.94017942 | 5.229777167 | 12.42553892 | 23.46231083 | 20.22622417 | 2.022881419 | 0.047 |
| Rbp7     | 63954  | 73.20832083 | 64.99948333 | 65.47007    | 262.1103167 | 114.5090167 | 85.78133417 | 2.021782721 | 0.050 |
| Pcdh12   | 53601  | 35.03722417 | 57.747825   | 55.38157917 | 68.24628583 | 109.5968883 | 123.2192867 | 2.018560445 | 0.017 |
| Tuft1    | 22156  | 45.3231475  | 47.2856525  | 26.58347583 | 58.45660167 | 66.35305417 | 120.6656042 | 2.017772754 | 0.031 |
| Smim14   | 68552  | 5.260833917 | 6.671731167 | 10.82814192 | 20.52037564 | 13.244445   | 11.48339092 | 2.017502355 | 0.026 |
| Trim12a  | 76681  | 111.3504008 | 122.3857075 | 205.8158333 | 277.478575  | 280.1323759 | 295.813575  | 2.016368312 | 0.007 |
| Apold1   | 381823 | 17.777655   | 34.18852083 | 18.13047667 | 42.47839917 | 48.17761667 | 44.13986583 | 2.01632322  | 0.012 |
| Samd10   | 229011 | 7.997011417 | 7.519264833 | 12.87296758 | 15.84233167 | 23.6963175  | 16.89572167 | 2.016036133 | 0.010 |
| Mapkapk3 | 102626 | 296.7993417 | 299.7701833 | 351.834475  | 646.647525  | 419.92785   | 943.7004442 | 2.015404542 | 0.017 |
| Camk1g   | 215303 | 23.47066583 | 26.47621083 | 20.00704583 | 47.7918075  | 48.31762583 | 43.696515   | 2.009619125 | 0.001 |
| Hist1h4i | 319158 | 63.46079727 | 59.69958083 | 42.0020575  | 127.7230358 | 92.80150167 | 108.89423   | 2.009218853 | 0.004 |
| Rasgrf2  | 19418  | 11.543823   | 19.86248083 | 7.157514417 | 20.09667333 | 22.7754225  | 28.78423333 | 2.001855285 | 0.042 |
| Cdkn1a   | 12575  | 33.59787333 | 45.95797    | 55.46687333 | 63.29614667 | 93.54462402 | 115.9672265 | 2.001435913 | 0.015 |

**SUPPLEMENTAL TABLE S2 Suppressed genes in smSocs3-KO aorta compared with WT aorta  
at the baseline**





|          |           |             |             |             |             |             |             |             |       |
|----------|-----------|-------------|-------------|-------------|-------------|-------------|-------------|-------------|-------|
| Pcsk6    | 18553     | 2860.36325  | 2911.440917 | 2165.289917 | 1101.061942 | 1635.4617   | 1118.477017 | 0.481590587 | 0.003 |
| Gm8702   | 667558    | 30.697825   | 16.9357825  | 23.97178167 | 10.84887058 | 15.4691475  | 8.296262833 | 0.481622471 | 0.016 |
| Ankrd36  | 76389     | 18.74938    | 13.0126175  | 11.41295058 | 10.33790433 | 3.865698583 | 7.82066075  | 0.482375021 | 0.041 |
| Sec144   | 103655    | 48.630985   | 36.2848975  | 39.726195   | 35.37558    | 12.50619233 | 17.931635   | 0.48370162  | 0.037 |
| Syt1     | 20979     | 55.43825833 | 49.38825167 | 51.22372917 | 40.54503331 | 22.548185   | 17.46669667 | 0.484676395 | 0.017 |
| Csmd2os  | 74989     | 25.97878583 | 16.17659583 | 23.28609333 | 8.190739833 | 12.04660183 | 11.39475867 | 0.486142288 | 0.006 |
| Fam178b  | 381337    | 44.17753583 | 31.25626667 | 39.16391333 | 22.89336167 | 15.48176583 | 17.55245    | 0.486348647 | 0.003 |
| Ildr1    | 106347    | 8.36926475  | 13.4964725  | 19.49249167 | 4.815884    | 8.117915583 | 6.586606417 | 0.489030307 | 0.028 |
| Pabpc2   | 18459     | 65.08502917 | 48.27895083 | 58.94612583 | 31.14145083 | 27.20945833 | 25.596405   | 0.489231605 | 0.001 |
| Gm3871   | 100042497 | 36.89673917 | 37.8660125  | 33.0973775  | 17.8422475  | 15.2910325  | 20.5874775  | 0.495244265 | 0.001 |
| Olf1316  | 258737    | 13.65212167 | 20.75422833 | 20.502105   | 15.8011125  | 6.125121833 | 7.305044333 | 0.495571915 | 0.044 |
| Skor1    | 207667    | 129.1217625 | 57.91846833 | 102.1128967 | 51.46538667 | 36.92027417 | 48.92666667 | 0.495613231 | 0.021 |
| Vsx1     | 114889    | 100.8597378 | 66.425275   | 88.58083833 | 71.24480333 | 36.84981417 | 27.77005333 | 0.497116382 | 0.037 |
| Ceacam20 | 71601     | 96.78628649 | 56.85151    | 83.5901325  | 49.99184833 | 32.73743083 | 34.52624917 | 0.497119479 | 0.010 |
